# Supplementary material
Source: Springer Nature journal article supplement (https://www.springermedizin.de/resource/supplementary/12933_2012_523_MOESM5_ESM.pdf/9538418)

Standardized Mean of Hemoglobin

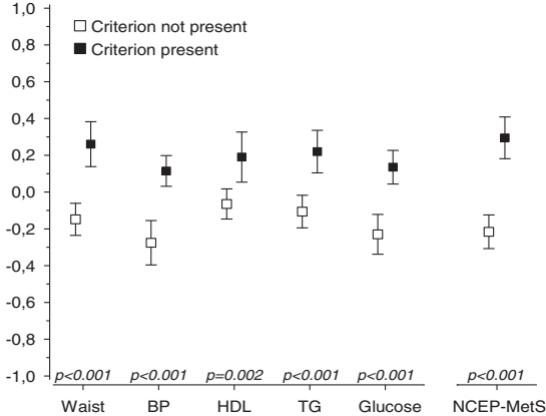

Supplement: MOESM5 [file 9538418]
